# Supplementary material
Source: MDPI journal article supplement (https://www.mdpi.com/2071-1050/15/16/12660)

**Figure S1. structure diagram**

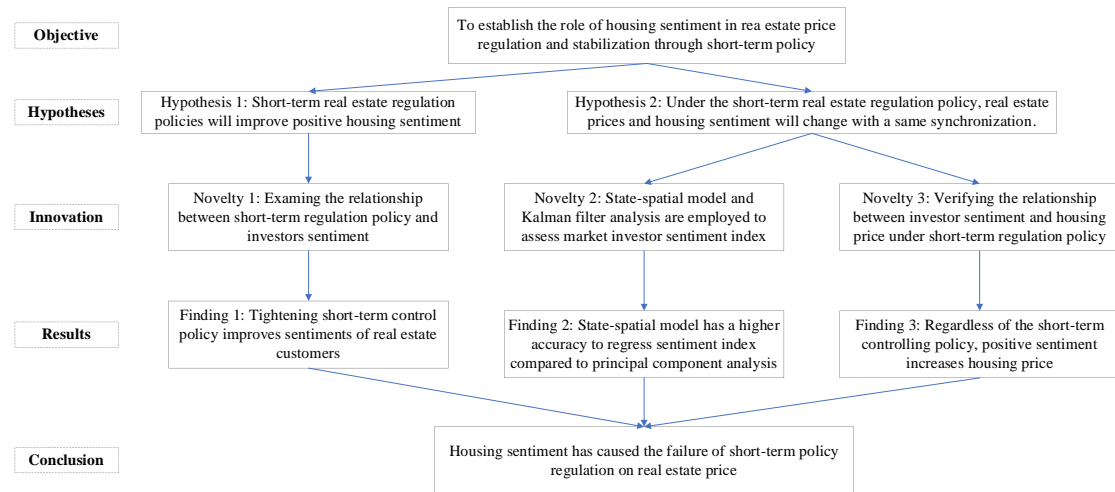

Supplement: s1 [file s1]
